# Supplementary material for: Modification of Heat-Related Mortality in an Elderly Urban Population by Vegetation (Urban Green) and Proximity to Water (Urban Blue): Evidence from Lisbon, Portugal
Source: PubMed Central journal article supplement (PMC4937850; doi:10.1289/ehp.1409529), 2015-11-13
Supplement: ehp.1409529.s001.acco.pdf [file ehp.1409529.s001.acco.pdf]

**Note to readers with disabilities:** *EHP* strives to ensure that all journal content is accessible to all readers. However, some figures and Supplemental Material published in *EHP* articles may not conform to [508 standards](#) due to the complexity of the information being presented. If you need assistance accessing journal content, please contact [ehp508@niehs.nih.gov](mailto:ehp508@niehs.nih.gov). Our staff will work with you to assess and meet your accessibility needs within 3 working days.

## **Supplemental Material**

# **Modification of Heat-Related Mortality in an Elderly Urban Population by Vegetation (Urban Green) and Proximity to Water (Urban Blue): Evidence from Lisbon, Portugal**

Katrin Burkart, Fred Meier, Alexandra Schneider, Susanne Breitner, Paulo Canário, Maria João Alcoforado, Dieter Scherer, and Wilfried Endlicher

### **Table of Contents**

**Table S1:** Average values of (equivalent) temperature, air pollution and death counts for the elderly above the age of 65 years

**Table S2:** Socioeconomic and sociospatial information on parish level

**Figure S1:** Difference in mortality increase among those > 65 years of age with a 1°C increase in UTCI above the 95th (a) and 99th (b) percentiles lags 0-2 for nighttime LST quartiles with 95% confidence intervals. GAMs allowing for interaction between UTCI and different nighttime LST classes were adjusted for long-term and seasonal trend (6 df per year), daily averages of O<sub>3</sub> and PM<sub>10</sub> (lag 0-1), percent of parish population >65 years of age, building density, proportion of college graduates and percentage of population receiving social benefits. Nighttime LST quartiles were 16.6°C, 17.7°C and 18.1°C.

**Figure S2:** Difference in mortality increase among those > 65 years of age with a 1°C increase in UTCI above the 95th (a) and 99th (b) percentiles lags 0-2 for daytime LST quartiles with 95% confidence intervals. GAMs allowing for interaction between UTCI and different daytime LST classes were adjusted for long-term and seasonal trend (6 df per year), daily averages of O<sub>3</sub> and PM<sub>10</sub> (lag 0-1), percent of parish population >65 years of age,

building density, proportion of college graduates and percentage of population receiving social benefits. Daytime LST quartiles were 32.3°C, 33.8°C and 35.0°C.

**Figure S3:** Difference in mortality increase among those > 65 years of age with a 1°C increase in temperature above the 95th (a) and 99th (b) percentiles lags 0-2 for NDVI quartiles with 95% confidence intervals. GAMs allowing for interaction between temperature and different NDVI classes were adjusted for long-term and seasonal trend (6 df per year), daily averages of O<sub>3</sub> and PM<sub>10</sub> (lag 0-1), percent of parish population >65 years of age, building density, proportion of college graduates and percentage of population receiving social benefits.

**Figure S4:** Difference in mortality increase among those > 65 years of age with a 1°C increase in temperature above the 95th (a) and 99th (b) percentile for lags 0-2 for areas with a distance of > 4 km and ≤ 4 km to the Atlantic Ocean and Tagus Estuary with 95% confidence intervals. GAMs allowing for interaction between temperature and distance classes were adjusted for long-term and seasonal trend (6 df per year), daily averages of O<sub>3</sub> and PM<sub>10</sub>, percent of parish population >65 years of age, building density, proportion of college graduates and percentage of population receiving social benefits.

**Figure S5:** Difference in mortality increase among those > 65 years of age with a 1°C increase in UTCI above the 95th (a) and 99th (b) percentiles lags 0-2 for nighttime LST quartiles with 95% confidence intervals. GAMs allowing for interaction between UTCI and different nighttime LST classes were adjusted for long-term and seasonal trend (6 df per year), daily averages of O<sub>3</sub> and PM<sub>10</sub> (lag 0-1), percent of parish population >65 years of age, building density, proportion of college graduates and percentage of population receiving social benefits. Nighttime LST quartiles were 16.6°C, 17.7°C and 18.1°C.

**Figure S6:** Difference in mortality increase among those > 65 years of age with a 1°C increase in UTCI above the 95th (a) and 99th (b) percentiles lags 0-2 for daytime LST quartiles with 95% confidence intervals. GAMs allowing for interaction between UTCI and different daytime LST classes were adjusted for long-term and seasonal trend (6 df per year), daily averages of O<sub>3</sub> and PM<sub>10</sub> (lag 0-1), percent of parish population >65 years of age, building density, proportion of college graduates and percentage of population receiving social benefits. Daytime LST quartiles were 32.3°C, 33.8°C and 35.0°C.

**Table S1:** Average values of (equivalent) temperature, air pollution and death counts for the elderly above the age of 65 years

|         | Temperature <sup>a</sup><br>[°C] | UTCI <sup>a</sup><br>[°C] | PM <sub>10</sub> <sup>a</sup><br>[µg/m <sup>3</sup> ] | O <sub>3</sub> <sup>a</sup><br>[µg/m <sup>3</sup> ] | Death counts <sup>b</sup> |
|---------|----------------------------------|---------------------------|-------------------------------------------------------|-----------------------------------------------------|---------------------------|
| Average | 16.5                             | 7.8                       | 44.8                                                  | 28.5                                                | 1657                      |
| Maximum | 22.6                             | 16.9                      | 58.8                                                  | 34.9                                                | 2167                      |
| Minimum | 10.9                             | -0.8                      | 27.5                                                  | 23.6                                                | 1356                      |

<sup>a</sup>Annual average

<sup>b</sup>Annual monthly average

**Table S2:** Socioeconomic and sociospatial information on parish level

| PCA                                    | Variable                                                            | Description                                                                                                  |
|----------------------------------------|---------------------------------------------------------------------|--------------------------------------------------------------------------------------------------------------|
| DENSITY                                | Percentage of built-up area                                         | Percentage (area occupied by buildings/total area) in civil parishes                                         |
|                                        | Population vs. percentage of built-up area                          | Civil parish population/percentage of built-up area                                                          |
|                                        | Building density                                                    | Number of buildings per km <sup>2</sup>                                                                      |
|                                        | Proportion of foreigners                                            | Percentage of population without portuguese nationality                                                      |
|                                        | Population density                                                  | Inhabitants per km <sup>2</sup>                                                                              |
|                                        | Population density in buildings                                     | Inhabitants per building                                                                                     |
| AGE                                    | Elderly dependece index                                             | Population aged 65 years or more as a percentage of the population between 15 and 64 years.                  |
|                                        | Percentage of population aged 65 years and above                    | Population ages 65 and above as a percentage of the total population                                         |
|                                        | Aging buildings index                                               | Number of buildings (Buildings built until 1945 / Buildings built after 1991) * 100                          |
|                                        | Average age of buildings (years)                                    | [(Number of buildings aged in class j * middle point of class j)/ Total buildings]*100                       |
|                                        | Average age of residents (years)                                    | Sum of ages of the resident population/ Resident population                                                  |
| Widowers                               | Percentage of widowers                                              |                                                                                                              |
| EDUCATION                              | Population with compulsory education                                | Percentage of population that completes compulsory education                                                 |
|                                        | Population with an academic graduation                              | Percentage of population with college degree                                                                 |
|                                        | More socially valued professions                                    | (Employed population in most valued professions / employed population)*100                                   |
|                                        | Illiteracy rate                                                     | [(Resident population 10 years and over (can not read or write) / resident population 10 years and over]*100 |
| <i>not assigned</i>                    | Sex ratio                                                           | Ratio of the population numbers of female and male                                                           |
|                                        | Sex ratio > 65 yrs.                                                 | Ratio of the population numbers of female and male (>65 years)                                               |
|                                        | Distance to nearest hospital                                        | Km                                                                                                           |
|                                        | Institutionalized population (total)                                | Percentage of population living in all kind of institutions                                                  |
|                                        | Institutionalized people (in social suport and health institutions) | Percentage of population living only in social suport and health institutions                                |
| Social security benefits /10000 inhab. | Population living from social security benefits /10000 inhabitants  |                                                                                                              |

Source: Portuguese Instituto Nacional de Estatística

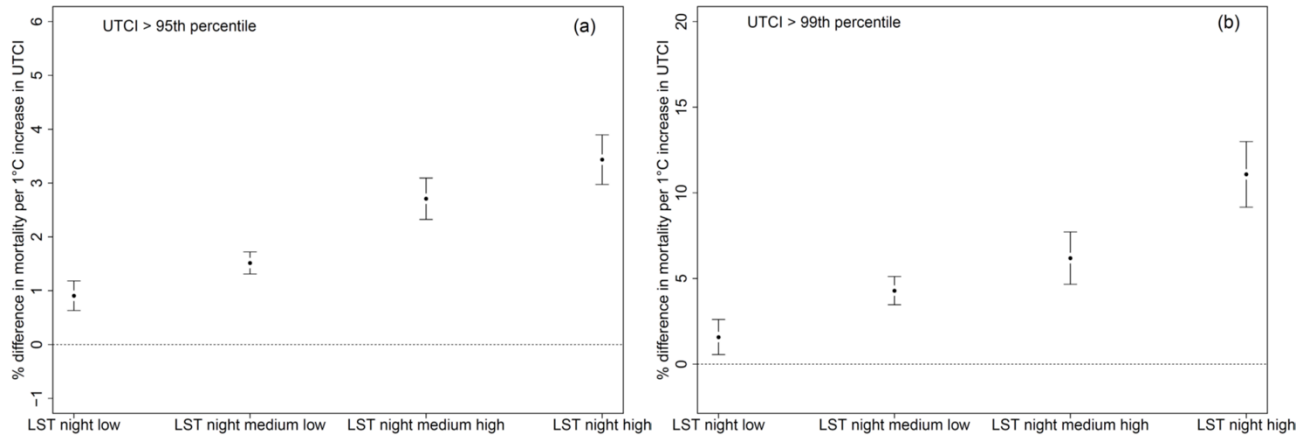

**Figure S1:** Difference in mortality increase among those > 65 years of age with a 1°C increase in UTCI above the 95th (a) and 99th (b) percentiles lags 0-2 for nighttime LST quartiles with 95% confidence intervals. GAMs allowing for interaction between UTCI and different nighttime LST classes were adjusted for long-term and seasonal trend (6 df per year), daily averages of O<sub>3</sub> and PM<sub>10</sub> (lag 0-1), percent of parish population >65 years of age, building density, proportion of college graduates and percentage of population receiving social benefits. Nighttime LST quartiles were 16.6°C, 17.7°C and 18.1°C.

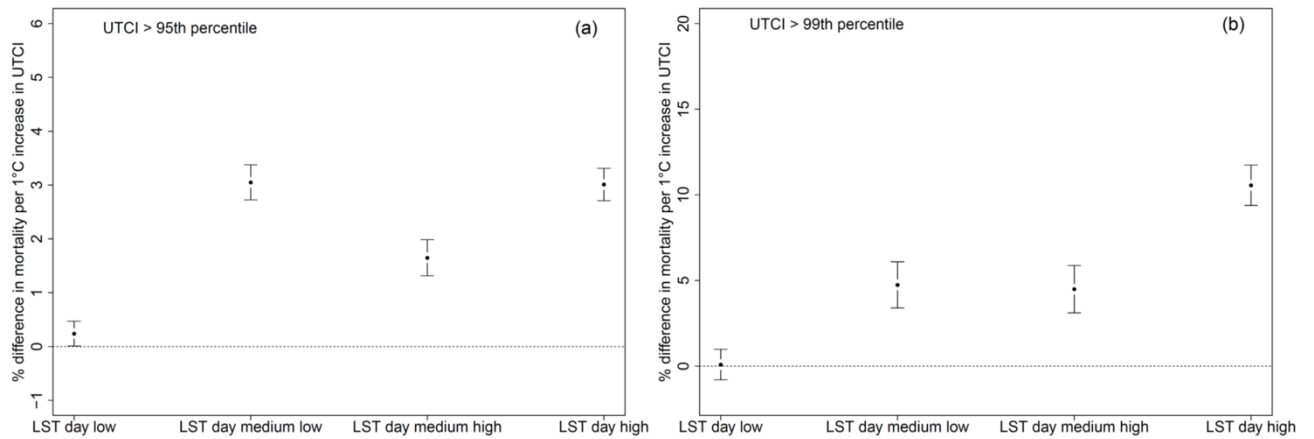

**Figure S2:** Difference in mortality increase among those > 65 years of age with a 1°C increase in UTCI above the 95th (a) and 99th (b) percentiles lags 0-2 for daytime LST quartiles with 95% confidence intervals. GAMs allowing for interaction between UTCI and different daytime LST classes were adjusted for long-term and seasonal trend (6 df per year), daily averages of O<sub>3</sub> and PM<sub>10</sub> (lag 0-1), percent of parish population >65 years of age, building density, proportion of college graduates and percentage of population receiving social benefits. Daytime LST quartiles were 32.3°C, 33.8°C and 35.0°C.

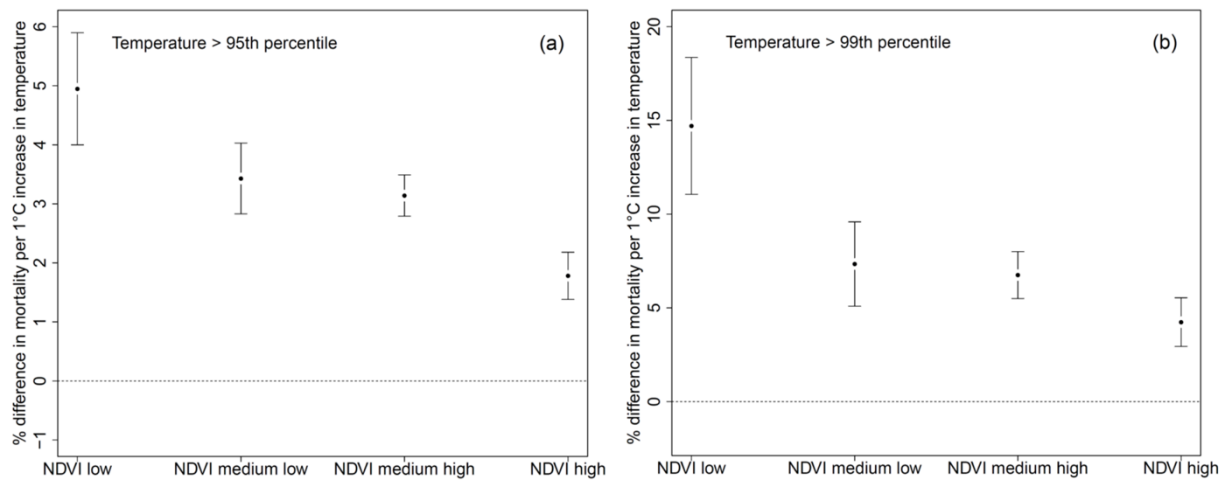

**Figure S3:** Difference in mortality increase among those > 65 years of age with a 1°C increase in temperature above the 95th (a) and 99th (b) percentiles lags 0-2 for NDVI quartiles with 95% confidence intervals. GAMs allowing for interaction between temperature and different NDVI classes were adjusted for long-term and seasonal trend (6 df per year), daily averages of O<sub>3</sub> and PM<sub>10</sub> (lag 0-1), percent of parish population >65 years of age, building density, proportion of college graduates and percentage of population receiving social benefits.

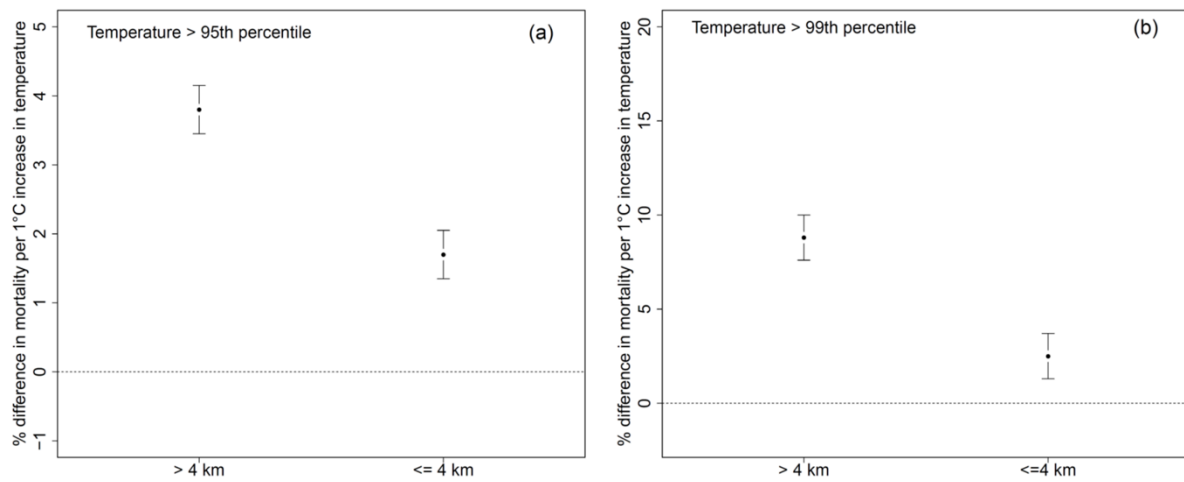

**Figure S4:** Difference in mortality increase among those > 65 years of age with a 1°C increase in temperature above the 95th (a) and 99th (b) percentile for lags 0-2 for areas with a distance of > 4 km and ≤ 4 km to the Atlantic Ocean and Tagus Estuary with 95% confidence intervals. GAMs allowing for interaction between temperature and distance classes were adjusted for long-term and seasonal trend (6 df per year), daily averages of O3 and PM10, percent of parish population >65 years of age, building density, proportion of college graduates and percentage of population receiving social benefits.



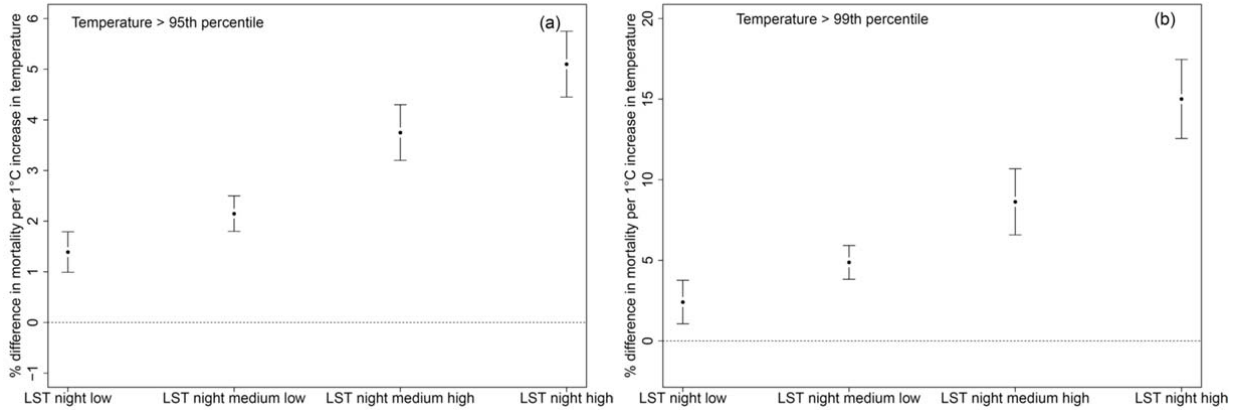

**Figure S5:** Difference in mortality increase among those > 65 years of age with a 1°C increase in UTCI above the 95th (a) and 99th (b) percentiles lags 0-2 for nighttime LST quartiles with 95% confidence intervals. GAMs allowing for interaction between UTCI and different nighttime LST classes were adjusted for long-term and seasonal trend (6 df per year), daily averages of O<sub>3</sub> and PM<sub>10</sub> (lag 0-1), percent of parish population >65 years of age, building density, proportion of college graduates and percentage of population receiving social benefits. Nighttime LST quartiles were 16.6°C, 17.7°C and 18.1°C.

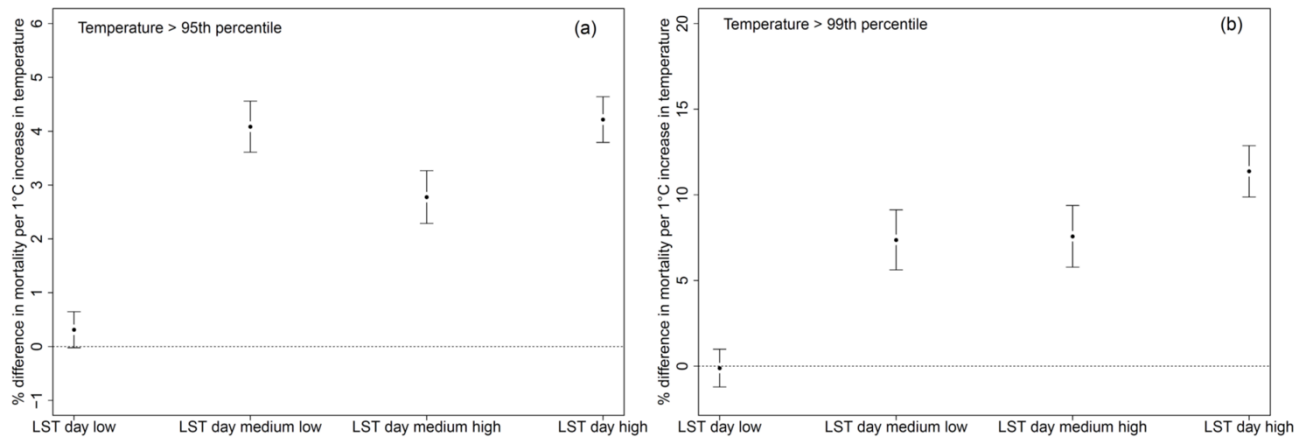

**Figure S6:** Difference in mortality increase among those > 65 years of age with a 1°C increase in UTCI above the 95th (a) and 99th (b) percentiles lags 0-2 for daytime LST quartiles with 95% confidence intervals. GAMs allowing for interaction between UTCI and different daytime LST classes were adjusted for long-term and seasonal trend (6 df per year), daily averages of O<sub>3</sub> and PM<sub>10</sub> (lag 0-1), percent of parish population >65 years of age, building density, proportion of college graduates and percentage of population receiving social benefits. Daytime LST quartiles were 32.3°C, 33.8°C and 35.0°C.
